# Supplementary material
Source: PubMed Central journal article supplement (PMC5152573)
Supplement: NIHMS833380-supplement-1-4.pdf [file NIHMS833380-supplement-1-4.pdf]

Supplemental table 1. Pancreatic cancer-related genes listed by gene classification set

| <b>Classification Set</b>             | <b>Genes</b>                                                    |
|---------------------------------------|-----------------------------------------------------------------|
| Mismatch repair (MMR)                 | <i>MSH2, MSH6, MLH1, PMS2</i>                                   |
| Autosomal dominant [AD] disorders     | <i>APC, BRCA1, BRCA2, CDKN2A, MEN1, PALLD, STK11, TP53, VHL</i> |
| Autosomal Recessive [AR]/AD disorders | <i>ATM, FANCA, FANCC, PALB2, XRCC2</i>                          |
| Hereditary/chronic pancreatitis       | <i>PRSS1, CTRC, CPA1, CFTR, CASR, SPINK1</i>                    |

Supplementary table 2. Source population, patients, families, *CDKN2A* mutation status, and study references for contributing studies

| Study Population     | Source                                                                                           | <i>CDKN2A</i> Mutation                                                      | Number of PC Patients | Number of Families | Study References                                                                        |
|----------------------|--------------------------------------------------------------------------------------------------|-----------------------------------------------------------------------------|-----------------------|--------------------|-----------------------------------------------------------------------------------------|
| American             | Melanoma family study                                                                            | p.V126D                                                                     | 5                     | 3                  | Goldstein et al, 2000; 2005                                                             |
|                      |                                                                                                  | p.R87P                                                                      | 1                     | 1                  |                                                                                         |
|                      |                                                                                                  | p.R80fs                                                                     | 1                     | 1                  |                                                                                         |
|                      |                                                                                                  | None                                                                        | 1                     | 1                  |                                                                                         |
|                      |                                                                                                  | <b>TOTAL:</b>                                                               | <b>8</b>              | <b>6</b>           |                                                                                         |
| Dutch                | Melanoma family study                                                                            | c.225-243del19                                                              | 17                    | 9                  | Bergman et al, 1992; Gruis et al, 1995; de Snoo et al, 2008; Research Protocol: P00.117 |
| Italian <sup>a</sup> | Melanoma family study and PC case-control study, Genoa [University and IRCCS AOU San Martino-IST | p.G101W (n=7), p.E27X (n=3), p.A127P, p.L65P, p.G67R, p.R144C, 201ACTC>CTTT | 15 <sup>b</sup>       | 15                 | Ghiorzo et al, 2006; 2012                                                               |
|                      |                                                                                                  | None                                                                        | 16 <sup>c</sup>       | 16                 |                                                                                         |
|                      | Clinical Study of PC/Melanoma, Turin (University)                                                | p.E27X, p.Q50X, p.G101W                                                     | 3                     | 3                  |                                                                                         |
|                      | Clinical Study of PC/Melanoma, Monza                                                             | None                                                                        | 1                     | 1                  |                                                                                         |
|                      | Clinical Study of PC/Melanoma, Bologna (University and Policlinico Sant'Orsola)                  | None                                                                        | 2                     | 2                  |                                                                                         |
|                      | <b>TOTAL:</b>                                                                                    | <b>37</b>                                                                   | <b>37</b>             |                    |                                                                                         |
| Swedish              | Melanoma family study, Stockholm                                                                 | p.112dupArg                                                                 | 3                     | 3                  | Borg et al, 1996; Platz et al, 1997; Hashemi et al, 2001; Hansson et al, 2007           |
|                      | Melanoma and cancer family study, Lund                                                           | p.112dupArg                                                                 | 4                     | 3                  |                                                                                         |
|                      |                                                                                                  | None                                                                        | 6 <sup>d</sup>        | 6                  |                                                                                         |
|                      | <b>TOTAL:</b>                                                                                    | <b>13</b>                                                                   | <b>12</b>             |                    |                                                                                         |

<sup>a</sup>All Italian PC patients in the study are unrelated, thus number of patients = number of families

<sup>b</sup>Patients with *CDKN2A* mutation: Personal/family history of melanoma (n=5), probands of multiplex PC families (n=6), or sporadic PC (n=4)

<sup>c</sup>Patients without *CDKN2A* mutation: Personal (n=7) or family history of melanoma (n=7) or family history of PC (n=2)

<sup>d</sup>Patients are from families with aggregations of pancreatic cancer  
PC, pancreatic cancer

Supplementary table 2 Study References (summarized)

Bergman W, Gruis NA, Frants RR (1992) Cytogenet Cell Genet 59:161-164

Borg A et al. (1996) Cancer Res 56:2497-2500

de Snoo FA et al. (2008) Clinical Cancer Res 14:7151-7157

Ghiorzo P et al. (2006) Hum Mol Genet 15:2682-2689

Ghiorzo P et al. (2012) J Med Genet 49:164-170

Goldstein AM, Struewing JP, Chidambaram A, Fraser MC, Tucker MA (2000) J Natl Cancer Inst 92:1006-1010

Goldstein AM, Landi MT, Tsang S, Fraser MC, Munroe DJ, Tucker MA (2005) Cancer Epidemiol Biomarkers Prev 14:2208-2212

Gruis NA et al. (1995) Nat Genet 10:351-353

Hansson J et al. (2007) J Clinical Oncol 25:2819-2824

Hashemi J et al. (2001) Genes, Chromosomes & Cancer 31:107-116

Platz A et al. (1997) J Natl Cancer Inst 89:697-702

Supplemental table 3. Number of pancreatic cancer patients and families from each study population

| Study Populations  | <i>CDKN2A</i> + |              | <i>CDKN2A</i> - |              | All             |              |
|--------------------|-----------------|--------------|-----------------|--------------|-----------------|--------------|
|                    | No. PC Patients | No. Families | No. PC Patients | No. Families | No. PC Patients | No. Families |
| American           | 7               | 5            | 1               | 1            | 8               | 6            |
| Dutch              | 17              | 9            | 0               | 0            | 17              | 9            |
| Italian            | 17              | 17           | 18              | 18           | 35              | 35           |
| Swedish            | 7               | 6            | 6               | 6            | 13              | 12           |
| TOTAL              | 48              | 37           | 25              | 25           | 73              | 62           |
| Total for Analysis | 43              | 33           | 23              | 23           | 66              | 56           |

No., Number; PC, pancreatic cancer

Supplemental table 4. Detailed information about variants observed in PC patients including type of variant, allele frequency in various databases, evidence for deleteriousness/pathogenicity, *CDKN2A* mutation carrier status, history of smoking, and patient/family ID

| GENE         | CHROM | LOCATION  | rsID        | REF | VAR | AA/protein change | Technivally validated (Y, N, ND)*1 | 1000                        | ESP                  | ExAC (All)  | ExAC Non-Finnish     | Meta LRP*2 | HGMD*3 | CLINVAR Clinical Significance | Ingenuity Variant Analysis | Align GVDG Score*4 | Gene-specific Database classification | Number of cases with variant | CDKN2A mutation carrier | History of smoking (yes/no/unk) | Family/Patient ID |        |
|--------------|-------|-----------|-------------|-----|-----|-------------------|------------------------------------|-----------------------------|----------------------|-------------|----------------------|------------|--------|-------------------------------|----------------------------|--------------------|---------------------------------------|------------------------------|-------------------------|---------------------------------|-------------------|--------|
|              |       |           |             |     |     |                   |                                    | Genome European Allele Freq | European Allele Freq | Allele Freq | European Allele Freq |            |        |                               |                            |                    |                                       |                              |                         |                                 |                   |        |
| <i>MSH2</i>  | chr2  | 47630331  | rs267607911 | A   | G   | M1V               | ND                                 |                             |                      | 8.31E-06    | 0                    | D          | DM     | Uncertain                     | Uncertain                  | C15                | Class 3*#                             | 1                            | yes                     | no*5                            | LUMC6_019         |        |
| <i>MSH2</i>  | chr2  | 47637248  | rs145649774 | C   | G   | L128V             | Y                                  |                             | 0.000349             | 3.54E-04    | 1.35E-04             | D          |        | Uncertain                     | Uncertain                  | C25                | Class 3                               | 1                            | yes                     | no                              | P147              |        |
| <i>MSH2</i>  | chr2  | 47641430  | rs34136999  | C   | T   | A272V             | Y                                  |                             | 0.000581             | 2.39E-04    | 3.76E-04             | D          | DM     | Uncertain                     | Uncertain                  | C0                 | Class 3                               | 1                            | no                      | no                              | P149              |        |
| <i>MSH6</i>  | chr2  | 48026852  | rs376220212 | G   | A   | R577H             | Y                                  |                             | 0.000116             | 4.12E-05    | 5.99E-05             | D          |        | Uncertain                     | Uncertain                  | C25                |                                       | 1                            | yes                     | no                              | P176              |        |
| <i>MSH6</i>  | chr2  | 48027269  |             | C   | G   | T716R             | Y                                  |                             |                      |             |                      | T          |        |                               | Uncertain                  | Uncertain          | C0                                    |                              | 1                       | yes                             | unk               | K_1001 |
| <i>MSH6</i>  | chr2  | 48030747  | rs587781609 | G   | A   | E1121K            | ND                                 |                             |                      |             |                      | T          |        | Uncertain                     | Uncertain                  | C0                 |                                       | 1                            | no                      | unk                             | P1                |        |
| <i>MLH1</i>  | chr3  | 37089053  | rs587782621 | G   | C   | S592T             | ND                                 |                             |                      | 8.24E-06    | 1.50E-05             | T          |        | Uncertain                     | Uncertain                  | C0                 |                                       | 1                            | yes                     | unk                             | M799              |        |
| <i>CASR</i>  | chr3  | 121994847 |             | C   | A   | F522L             | ND                                 |                             |                      | 8.24E-06    | 1.50E-05             | T          |        |                               | Uncertain                  |                    |                                       | 1                            | no                      | unk                             | DK1810            |        |
| <i>PALLD</i> | chr4  | 169433083 | rs149345491 | G   | A   | R143H             | ND                                 | 0                           | 0.000116             | 9.88E-05    | 9.04E-05             | T          |        |                               | Uncertain                  |                    |                                       | 1                            | yes                     | unk                             | T2427             |        |
| <i>APC</i>   | chr5  | 112177694 |             | A   | G   | I2135V            | ND                                 |                             |                      | 1.65E-05    | 3.00E-05             | T          |        |                               | Uncertain                  |                    |                                       | 1                            | yes                     | unk                             | LUMC19_015        |        |
| <i>PMS2</i>  | chr7  | 6013060   | rs371673459 | G   | C   | I853M             | Y                                  |                             | 0.000247             | 1.58E-04    | 2.96E-04             | T          |        | Uncertain                     | Uncertain                  | C0                 |                                       | 1                            | yes                     | no                              | M402              |        |
| <i>PMS2</i>  | chr7  | 6013076   |             | G   | A   | P848L             | Y                                  |                             |                      |             |                      | D          |        | Uncertain                     | Uncertain                  | C65                |                                       | 1                            | no                      | unk                             | P1                |        |
| <i>PMS2</i>  | chr7  | 6022617   | rs587780046 | G   | A   | T671M             | ND                                 |                             |                      | 1.80E-04    | 6.34E-04             | D          |        | Uncertain                     | Uncertain                  | C0                 |                                       | 1                            | no                      | yes                             | P282              |        |
| <i>PMS2</i>  | chr7  | 6026397   | rs587780045 | C   | T   | E667K             | Y                                  |                             |                      | 5.77E-05    | 9.10E-05             | T          |        | Uncertain                     | Uncertain                  | C15                |                                       | 1                            | no                      | no                              | M595              |        |
| <i>PMS2</i>  | chr7  | 6027156   | rs370752614 | C   | A   | D414Y             | ND                                 |                             | 0.000116             | 8.24E-06    | 0                    | T          |        | Uncertain                     | Uncertain                  | C0                 |                                       | 1                            | yes                     | unk                             | LUMC22_004        |        |
| <i>CFTR</i>  | chr7  | 117171037 | rs201958172 | G   | A   | A120T             | Y                                  |                             |                      | 1.15E-04    | 1.36E-04             | D          | DM     |                               | Uncertain                  |                    | Pancreatitis, CF                      | 1                            | yes                     | no                              | M402              |        |
| <i>CFTR</i>  | chr7  | 117171152 | rs397508725 | G   | C   | S158T             | Y                                  |                             |                      | 1.65E-05    | 1.73E-05             | D          | DM?    |                               | Uncertain                  |                    |                                       | 1                            | yes                     | no                              | P61               |        |
| <i>CFTR</i>  | chr7  | 117243784 | rs151048781 | G   | C   | M952I             | Y                                  |                             | 0                    | 9.06E-05    | 1.20E-04             | D          | DM     |                               | Uncertain                  |                    |                                       | 1                            | no                      | yes                             | P115              |        |
| <i>CFTR</i>  | chr7  | 117250625 | rs149279509 | A   | G   | Y1014C            | Y                                  | 0.001                       | 0.000349             | 2.72E-04    | 4.06E-04             | D          | DM     | Uncertain                     | Uncertain                  |                    | Pancreatitis, CF                      | 2                            | yes                     | unk                             | K_1001, K_1002    |        |
| <i>CPA1</i>  | chr7  | 130023239 |             | C   | T   | T164M             | ND                                 |                             |                      | 6.59E-05    | 0                    | T          |        |                               | Uncertain                  |                    |                                       | 1                            | no                      | yes                             | P100              |        |
| <i>CPA1</i>  | chr7  | 130023275 |             | C   | T   | T176M             | Y                                  |                             |                      | 1.65E-05    | 3.03E-05             | T          |        |                               | Uncertain                  |                    |                                       | 1                            | no                      | unk                             | RU7185            |        |
| <i>ATM</i>   | chr11 | 108122581 |             | T   | G   | L542W             | Y                                  |                             |                      |             |                      | D          |        |                               | Uncertain                  | Likely             | C55                                   |                              | 1                       | no                              | no                | P268   |
| <i>ATM</i>   | chr11 | 108155142 |             | AG  |     | E1313fs           | Y                                  |                             |                      |             |                      |            |        |                               | Pathogenic                 |                    |                                       | 1                            | no                      | no                              | M595              |        |
| <i>ATM</i>   | chr11 | 108183151 | rs587779852 | G   | T   | E1978*            | Y                                  |                             |                      | 6.59E-05    | 1.05E-04             |            | DM     | Pathogenic                    | Pathogenic                 |                    |                                       | 1                            | no                      | unk                             | AJ7379            |        |
| <i>ATM</i>   | chr11 | 108196797 | rs567060474 | G   | A   | A2274T            | Y                                  | 0.001                       |                      | 1.07E-04    | 1.96E-04             | D          | DM?    | Uncertain                     | Uncertain                  | C55                |                                       | 1                            | no                      | yes                             | P115              |        |
| <i>ATM</i>   | chr11 | 108216600 |             | T   | C   | L2850S            | Y                                  |                             |                      |             |                      | T          |        |                               | Uncertain                  | C65                |                                       | 1                            | no                      | no                              | P140              |        |
| <i>BRCA2</i> | chr13 | 32907000  | rs56403624  | A   | G   | E462G             | ND                                 |                             | 0.000349             | 2.39E-04    | 4.07E-04             | T          | DM?    | Benign                        | Benign                     | C0                 | Uncertain                             | 1                            | no                      | unk                             | LM1534-MA3432     |        |
| <i>BRCA2</i> | chr13 | 32907418  |             | A   | C   | K601N             | ND                                 |                             |                      | 4.94E-05    | 9.26E-05             | T          |        |                               | Uncertain                  | C0                 |                                       | 1                            | no                      | unk                             | UA6685            |        |
| <i>BRCA2</i> | chr13 | 32914288  | rs80359537  | AT  |     | H1932fs           | QC                                 |                             |                      |             |                      |            | DM     |                               | Pathogenic                 |                    |                                       | 1                            | no                      | yes                             | P153              |        |
| <i>BRCA2</i> | chr13 | 32954034  | rs80359164  | A   | G   | Q3034R            | ND                                 |                             |                      | 1.65E-05    | 3.15E-05             | T          | DM     | Uncertain                     | Uncertain                  | C0                 | Uncertain                             | 1                            | yes                     | yes                             | P93               |        |
| <i>PALB2</i> | chr16 | 23646627  | rs180177100 | G   | A   | R414*             | Y                                  |                             |                      |             |                      |            | DM     | Pathogenic                    | Pathogenic                 |                    |                                       | 1                            | no                      | unk                             | AJ7379            |        |
| <i>FANCA</i> | chr16 | 89858430  |             | CTT |     | E377del           | Y                                  |                             |                      |             |                      |            |        |                               | Uncertain                  |                    |                                       | 1                            | no                      | yes                             | P282              |        |
| <i>TP53</i>  | chr17 | 7576911   | rs145151284 | G   | C   | T312S             | ND                                 | 0                           | 0                    | 9.06E-05    | 8.99E-05             | D          |        | Uncertain                     | Uncertain                  | C0                 |                                       | 1                            | no                      | no                              | P268              |        |
| <i>BRCA1</i> | chr17 | 41256266  | rs28897673  | T   | C   | Y105C             | ND                                 |                             | 0.000116             | 5.77E-05    | 1.05E-04             | D          | DM?    | Benign                        | Likely Benign              | C15                | Benign                                | 2                            | yes                     | yes                             | LUMC19_013,       |        |
| <i>BRCA1</i> | chr17 | 41276071  | rs80357031  | T   | G   | I15L              | ND                                 |                             |                      |             |                      | T          |        | Uncertain                     | Uncertain                  | C0                 | Uncertain                             | 1                            | no                      | yes                             | LUMC19_016        |        |

\*1 Y=yes, N= no, ND= not done

\*2 D=deleterious, T=tolerated

\*3 DM=disease causing mutation; DM?= questionable disease causing mutation

\*4 Classified from least likely (C0) to most likely to interfere with function (C65)

\*# Class 3 = uncertain, insufficient evidence to classify as pathogenic or benign

\*5 Extensive passive smoking exposure

CHROM, chromosome; REF, referent; VAR, variant; AA, amino acid; LRP, likelihood ratio prediction; HGMD, Human Gene Mutation Database

Freq, frequency; ESP, Exome Sequencing Project; CF, cystic fibrosis; ExAC, Exome Aggregation Consortium; GVDG, Grantham Variation and Grantham Deviation
